# Supplementary material
Source: publisher figshare collection journal article supplement (https://acs.figshare.com/ndownloader/files/14601473)
Supplement: Supplementary file 1 [file 14601473]

## Supporting Information

### A tale of two water supplies in China: finding practical solutions to urban and rural water supply problems

Er Bei<sup>1#</sup>, Xiaomei Wu<sup>2#</sup>, Yu Qiu<sup>1</sup>, Chao Chen<sup>1,3\*</sup>, Xiaojian Zhang<sup>1,3</sup>

1. State Key Joint Laboratory of Environmental Simulation and Pollution Control,

School of Environment, Tsinghua University, Beijing, China, 100084

2. China Institute of Water Resources and Hydropower Research, Beijing, China,

100038

3. Research Institute for Environmental Innovation (Suzhou), Tsinghua, Suzhou,

China, 215163

\* Corresponding author: [chen\\_water@tsinghua.edu.cn](mailto:chen_water@tsinghua.edu.cn)

# The first two authors contribute equally to this paper.

## 1. Preparation of Figure 1

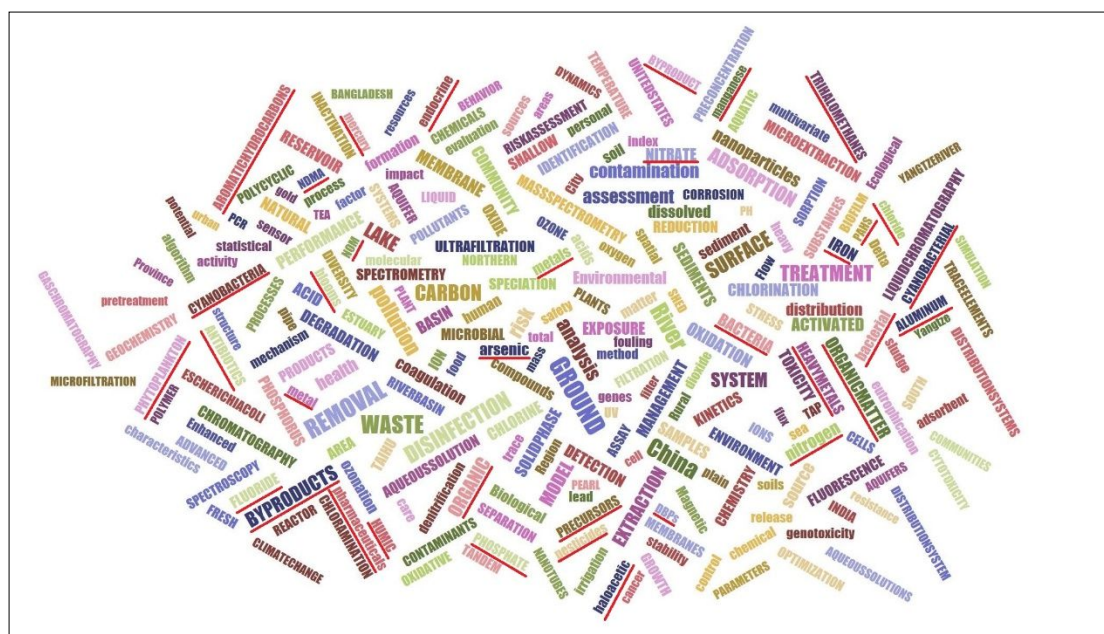

Fig. 1. Word cloud analysis of keywords regarding China's drinking water quality.

(Note: The whole keywords of 2846 related literature were searched from [www.webofknowledge.com/](http://www.webofknowledge.com/) and submitted to <https://www.jasondavies.com/wordcloud/> to create the word cloud analysis. The water quality issues were underlined. More details could be found in the Supporting Information.)

We searched the website “[www.webofknowledge.com/](http://www.webofknowledge.com/)” for each literature written by Chinese scholars with the keywords of “drinking water” and “quality”. A total of 2846 records were obtained from the core collection. The whole keywords of these records were collected by us and uploaded to the open source website “<https://www.jasondavies.com/wordcloud/>”. Then, word cloud analysis results could be got for free.

## 2. Preparation of Table 1

Table 1. Statistics of the water treatment plants with advanced treatment process around China

| Regions         | Provincial areas | Number | Capacity (kilo m <sup>3</sup> /d) |
|-----------------|------------------|--------|-----------------------------------|
| North China     | Beijing          | 6      | 3400                              |
|                 | Tianjin          | 5      | 1200                              |
|                 | Hebei            | 8      | 1250                              |
|                 | Shanxi           | 1      | 400                               |
|                 | Inner Mongolia   | 1      | 300                               |
| Northeast China | Heilongjiang     | 5      | 860                               |
|                 | Jilin            | 2      | 500                               |
| East China      | Shanghai         | 12     | 4600                              |
|                 | Jiangsu          | 79     | 15000                             |
|                 | Zhejiang         | 24     | 5000                              |
|                 | Anhui            | 1      | 80                                |
|                 | Shandong         | 13     | 1600                              |
| Central China   | Henan            | 3      | 1000                              |
|                 | Hunan            | 5      | 1400                              |
| South China     | Guangdong        | 7      | 3000                              |
| Southwest China | Yunnan           | 1      | 300                               |
| Northwest       | /                | 0      | 0                                 |
| Total           |                  | 173    | 39890                             |

The authors made the statistics by searching the literature, searching the homepage of some water companies, and calling the engineers in some water companies to verify the information. The following reference was also used.

Cui Y.C., Cui X.B., Shi X.D., Shi R. Brief history of the studies of drinking water treatment with the micro-polluted source water in China and that of the Society. Annual Conference of the National Drinking Water Advanced Treatment Society. Zhengzhou, China, 2018.10. (in Chinese)

### 3. Supporting information for Section 3.1.4

Table S1. Specific emergency treatment technologies for the pollutants concerned in China water industries

| Technology                             | Heavy metals       | Inorganic ions     | Pesticides & herbicides                                                                                                                                                                                                                               | Benzenes & derivatives                                                                                                                                                                                                                                                                                                                                                                                                                     | Short-chain Chlorohydrocarbon | Other organic chemicals                                                                                                                                                                                                                                            | Disinfectant & DBPs                | Pathogen & microbe*       | No. of items |
|----------------------------------------|--------------------|--------------------|-------------------------------------------------------------------------------------------------------------------------------------------------------------------------------------------------------------------------------------------------------|--------------------------------------------------------------------------------------------------------------------------------------------------------------------------------------------------------------------------------------------------------------------------------------------------------------------------------------------------------------------------------------------------------------------------------------------|-------------------------------|--------------------------------------------------------------------------------------------------------------------------------------------------------------------------------------------------------------------------------------------------------------------|------------------------------------|---------------------------|--------------|
| Conventional process                   | Ag, Ba             | Phosphate          | Decamethrin (nonsoluble)                                                                                                                                                                                                                              |                                                                                                                                                                                                                                                                                                                                                                                                                                            |                               |                                                                                                                                                                                                                                                                    |                                    | Coliform, F-coliform, TBC | 7            |
| Powdered Activated Carbon adsorption** | Limited efficiency | Limited efficiency | DDT, Rogor, Parathion-methyl, Parathion, Malathion, Demeton, Dichlorovos, Dipterex, Chlorothalonil, Atrazine, 2,4-D, Bentazone, Lindane, hexachlorocyclohexane, Heptachlor, Heptachlor epoxide, Alachlor, Furadan, Chlorpyrifos, Pentachlorophenol 20 | Benzene, Toluene, Ethylbenzene, Xylene, Styrene, Chlorobenzene, 1,2-Dichlorobenzene, 1,4-Dichlorobenzene, Trichlorobenzene, Tetrachlorobenzene, Hexachlorobenzene, Cumin, Phenol, 2,4,6-Trichlorophenol, 2,4-Dichlorophenol, Nitrobenzene, 2,4-Dinitrobenzene, 2,4,6-Trinitrobenzene, Nitrochlorobenzene, 2,4-Nitrochlorobenzene, Aniline, Benzidine, Polycyclic aromatic hydrocarbon (PAH), Benzpyrene, Polychlorinated biphenyl (PCB) 26 | Limited efficiency            | Pentachloropropane, Chloroprene, Hexachloro-1,3-butadiene, Anion synthetic detergent, Di-Sec-octyl phthalate, Dibutylphthalate, Diethylphthalate, Oils, Epichlorohydrin, Microcystin-LR, Geosmin, 2-methylisoborneol, Bisphenol A, Turpentine, Chrysolepic acid 15 | Limited efficiency for formed DBPs |                           | 61           |

| Technology             |                           | Heavy metals                                  | Inorganic ions                                                                                           | Pesticides & herbicides                                                                   | Benzenes & derivatives | Short-chain Chlorohydrocarbon | Other organic chemicals                                                                                                   | Disinfectant & DBPs                                                                           | Pathogen & microbe* | No. of items |
|------------------------|---------------------------|-----------------------------------------------|----------------------------------------------------------------------------------------------------------|-------------------------------------------------------------------------------------------|------------------------|-------------------------------|---------------------------------------------------------------------------------------------------------------------------|-----------------------------------------------------------------------------------------------|---------------------|--------------|
| Chemical precipitation | By alkaline precipitation | Ag, Be, Cd, Co, Cu, Hg, Mn, Ni, Pb, V, Ti, Zn |                                                                                                          |                                                                                           |                        |                               |                                                                                                                           |                                                                                               |                     | 19           |
|                        | By sulfide                | Ag, Cd, Cu, Hg, Ni, Pb, Zn                    |                                                                                                          |                                                                                           |                        |                               |                                                                                                                           |                                                                                               |                     |              |
|                        | By ferric precipitation   | As, Mo, Sb, Se, V                             |                                                                                                          |                                                                                           |                        |                               |                                                                                                                           |                                                                                               |                     |              |
|                        | Combined or other ***     | As, Ag, Ba, Cr(VI), Sb, Tl                    |                                                                                                          |                                                                                           |                        |                               |                                                                                                                           |                                                                                               |                     |              |
| Oxidation or reduction | Oxidation                 | Mn <sup>2+</sup>                              | S <sup>2-</sup> , CN <sup>-</sup> , NH <sub>4</sub> <sup>+</sup> (<2 mg/L), NO <sub>2</sub> <sup>-</sup> | Hard to achieve mineralization. Needs concern for the formation of transition by-products |                        |                               | Microcystin-LR, Methyl mercaptan, Dimethylsulfur, Dimethyldisulfur, Dimethyltrisulfur, Ethyl mercaptan, Hydrazine hydrate | CNCl                                                                                          |                     | 13           |
|                        | Combined                  | As (III), Cr(VI), Se, Tl (I)                  |                                                                                                          |                                                                                           |                        |                               |                                                                                                                           |                                                                                               |                     | 3            |
|                        | Reduction                 |                                               |                                                                                                          |                                                                                           |                        |                               |                                                                                                                           | ClO <sub>3</sub> <sup>-</sup> , ClO <sub>2</sub> <sup>-</sup> , BrO <sub>3</sub> <sup>-</sup> |                     | 3            |

| Technology                                      |                    | Heavy metals | Inorganic ions                                                           | Pesticides & herbicides | Benzenes & derivatives | Short-chain Chlorohydrocarbon                                                                                                                                                                                | Other organic chemicals | Disinfectant & DBPs                                                                            | Pathogen & microbe*                                         | No. of items |
|-------------------------------------------------|--------------------|--------------|--------------------------------------------------------------------------|-------------------------|------------------------|--------------------------------------------------------------------------------------------------------------------------------------------------------------------------------------------------------------|-------------------------|------------------------------------------------------------------------------------------------|-------------------------------------------------------------|--------------|
| Air stripping                                   |                    |              |                                                                          |                         | Benzene                | Chloroethelene, dichloromethane, 1,2-dichloroethane, 1,1-dichloroethylene, 1,2-dichloroethylene, 1,1,1-trichloroethane, 1,1,2-trichloroethane, Trichloroethylene, Tetrachloroethylene, Carbon tetrachloride, |                         | CHCl <sub>3</sub> , CHBrCl <sub>2</sub> , CHBr <sub>2</sub> Cl, CHBr <sub>3</sub> , Total THMs |                                                             | 15           |
| Enhanced disinfection                           |                    |              |                                                                          |                         |                        |                                                                                                                                                                                                              |                         |                                                                                                | TBC, Coliform, F-Coliform, E coli, Giardia, Cryptosporidium | 6            |
| Other methods                                   | Special adsorption | As           | F                                                                        |                         |                        |                                                                                                                                                                                                              |                         |                                                                                                |                                                             | 2            |
| No effective emergency treatment technology yet |                    |              | NH <sub>4</sub> <sup>+</sup> (>2 mg/L), NO <sub>3</sub> <sup>-</sup> , B |                         |                        |                                                                                                                                                                                                              | Aldehyde                | DCAA, TCAA, Formaldehyde, Chloral,                                                             |                                                             | 13           |

---

| Technology | Heavy metals | Inorganic ions | Pesticides & herbicides | Benzenes & derivatives | Short-chain Chlorohydrocarbon | Other organic chemicals | Disinfectant & DBPs | Pathogen & microbe* | No. of items |
|------------|--------------|----------------|-------------------------|------------------------|-------------------------------|-------------------------|---------------------|---------------------|--------------|
|            |              |                |                         |                        |                               |                         | NDMA                |                     |              |
| Summary    | 19           | 7              | 21                      | 26                     | 10                            | 23                      | 14                  | 6                   | 126          |

Note: \* F-coliform indicates fecal coliform. TBC indicates total bacteria count.

\*\* Powdered activated carbon adsorption is very useful for emergency response. The adsorption parameters of each chemical was determined by our jar tests instead of literature because few literature conducted adsorption isotherm experiments in the scope of low concentration around drinking water criteria. For example, the parameters of the Freundlich equilibrium equation for DDT removal in one reference were  $k=0.322$  and  $1/n=0.50$ , while those obtained in this test were  $k=0.0398$  and  $1/n=0.4244$  in the scope of 0.001 to 0.05 mg/L. To reduce the DDT concentration from 0.025 to 0.001 mg/L, the required PAC dosages were 2.4 mg/L and 11.3 mg/L, respectively, according to the reference and this test. The low dosage according to the literature cannot support the emergency treatment.

\*\*\* “Combined” refers to the combination of oxidation or reduction and precipitation. After the oxidation or reduction, the transited contaminants have the species with low solubility which could be removed by precipitation.

Reference: Zhang Y., Zhang X.J., Chen C., Dong H. Guidelines for emergency drinking water treatment, Edition 2. China Architecture and Building Press, Beijing, 2017. (In Chinese)
